# Supplementary material for: The intramolecular sp2 and sp3 C–H bond activation of (p-cymene)ruthenium(ii) N-heterocyclic carbene complexes
Source: Royal Society of Chemistry journal article supplement (doi:10.1039/b818091a), 2009-01-01

**SUPPLEMENTARY INFORMATION for:**

**The Intramolecular  $sp^2$  and  $sp^3$  C–H Bond Activation of  
(*p*-Cymene)Ruthenium(II) N-Heterocyclic Carbene  
Complexes**

Congying Zhang, Yang Zhao, Bin Li, Haibin Song, Shansheng Xu, Baiquan Wang\*

State Key Laboratory of Elemento-Organic Chemistry, College of Chemistry, Nankai University, Tianjin 300071, and State Key Laboratory of Organometallic Chemistry, Shanghai Institute of Organic Chemistry, Chinese Academy of Sciences, Shanghai 200032, People's Republic of China

E-mail: [bqwang@nankai.edu.cn](mailto:bqwang@nankai.edu.cn); Fax: +86-22-23504781

# $^1\text{H}$ NMR and $^{13}\text{C}$ NMR spectra of all compounds

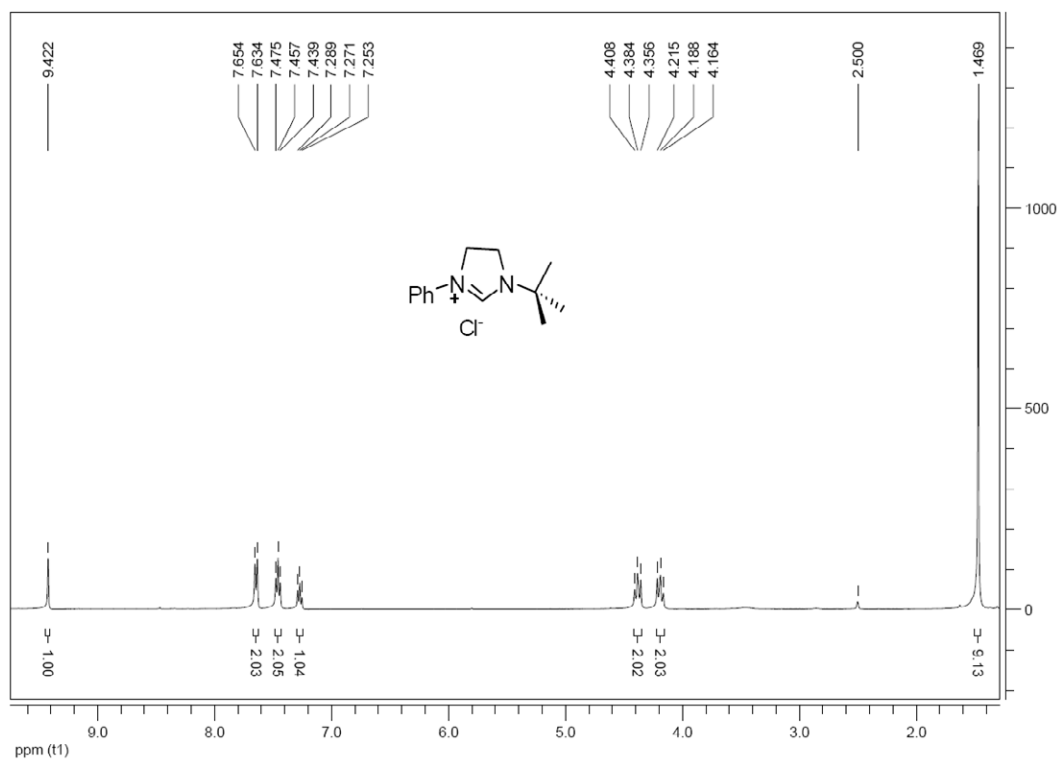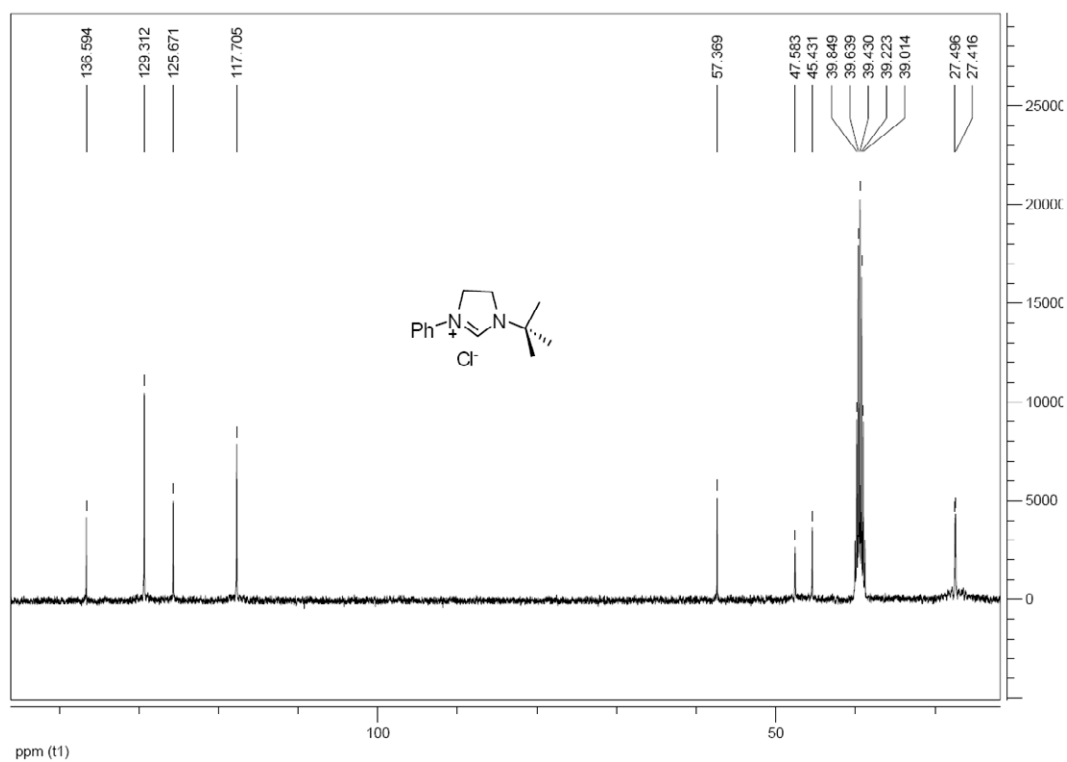

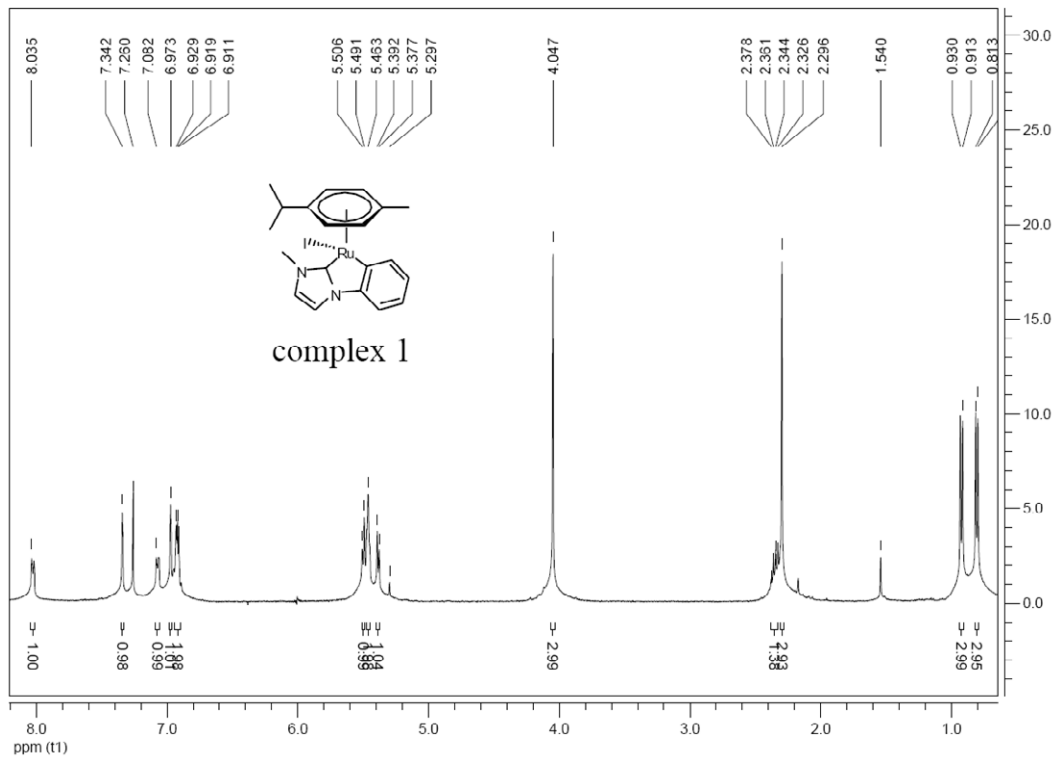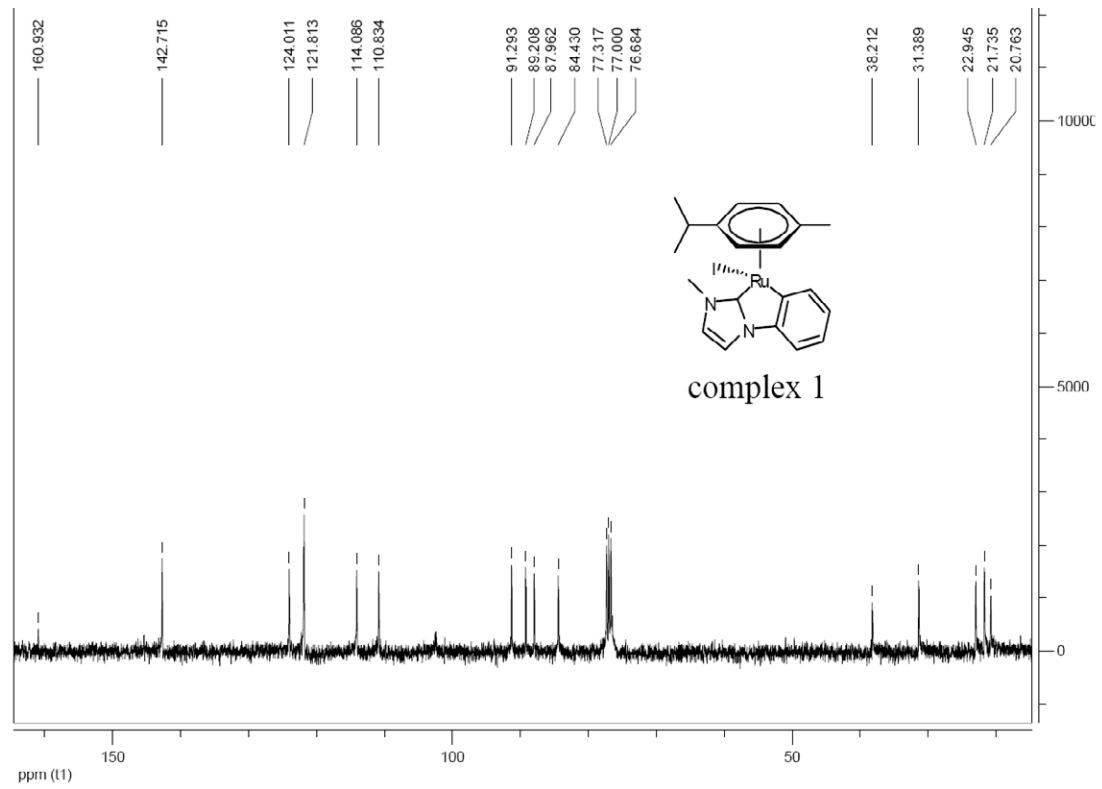

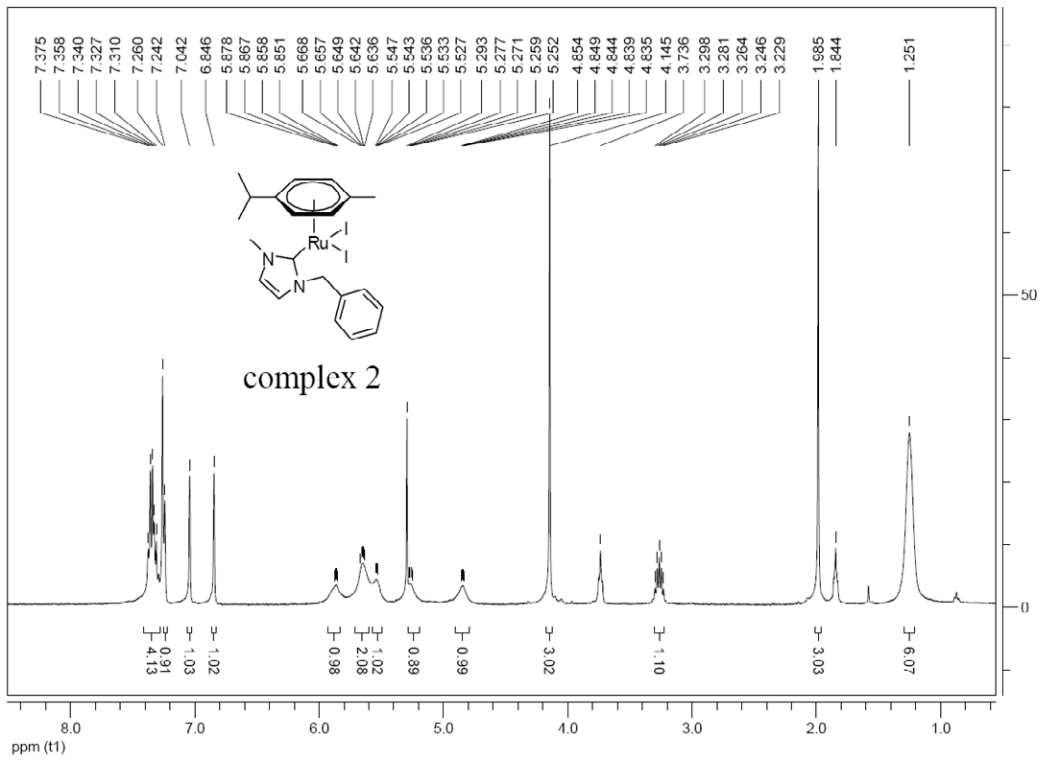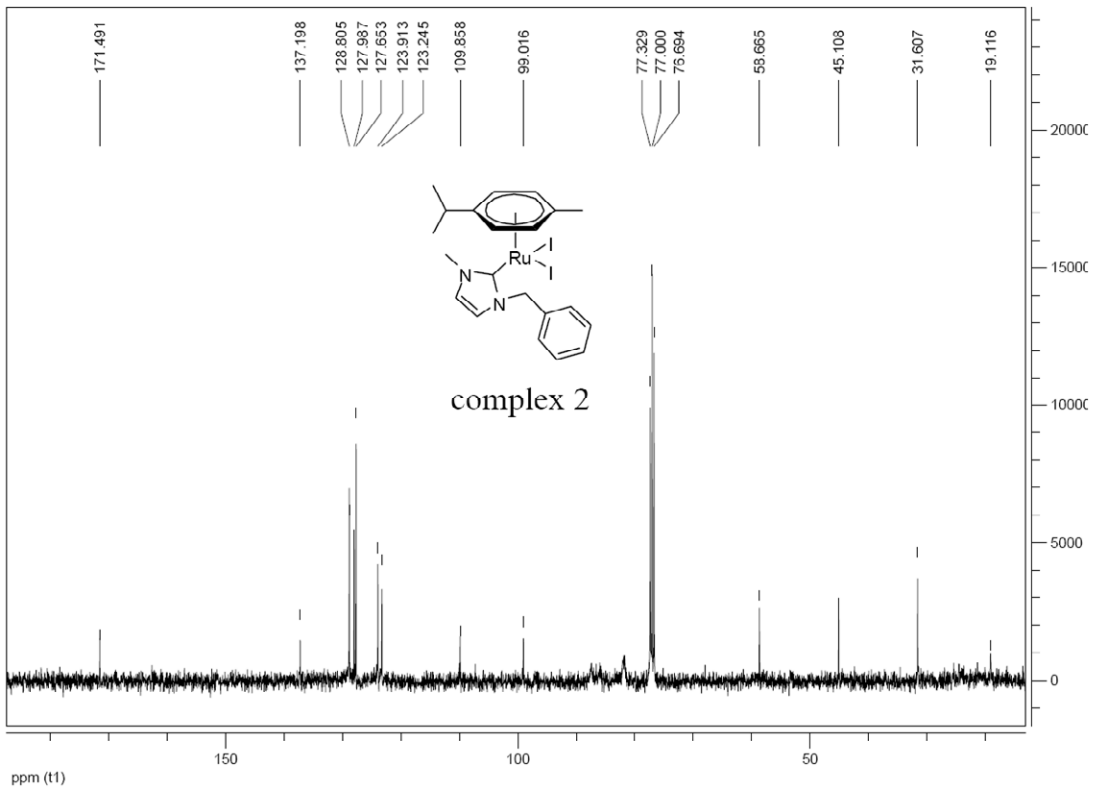

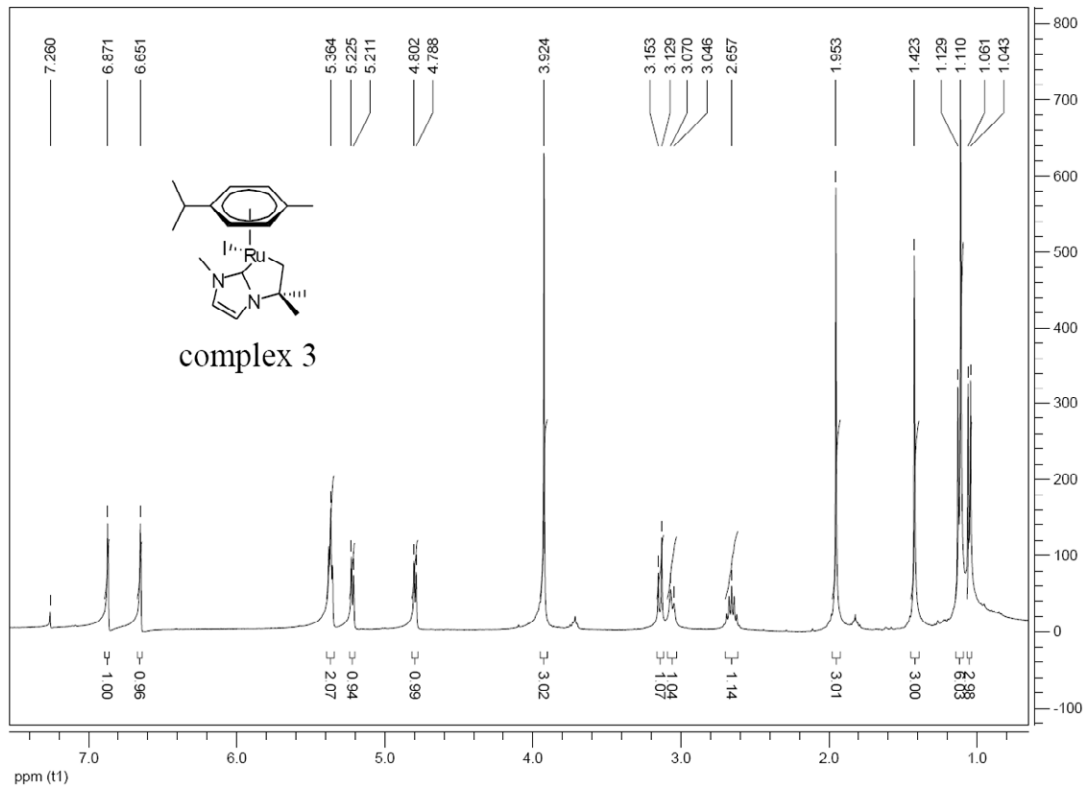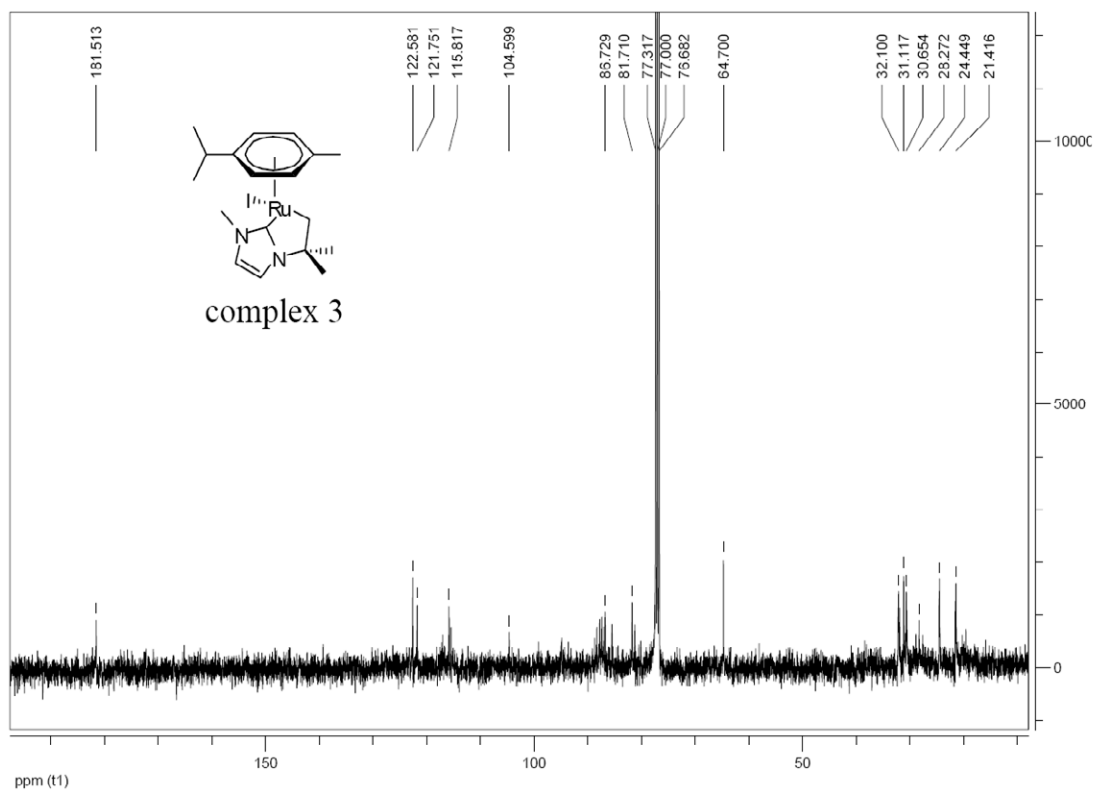

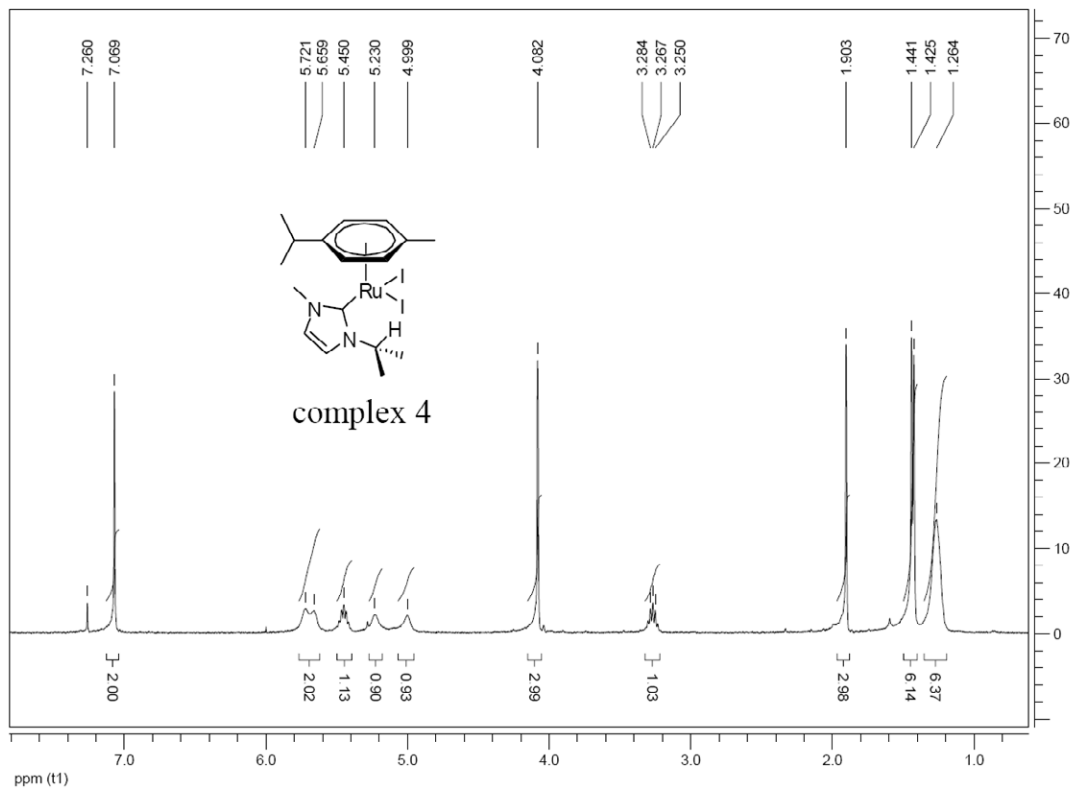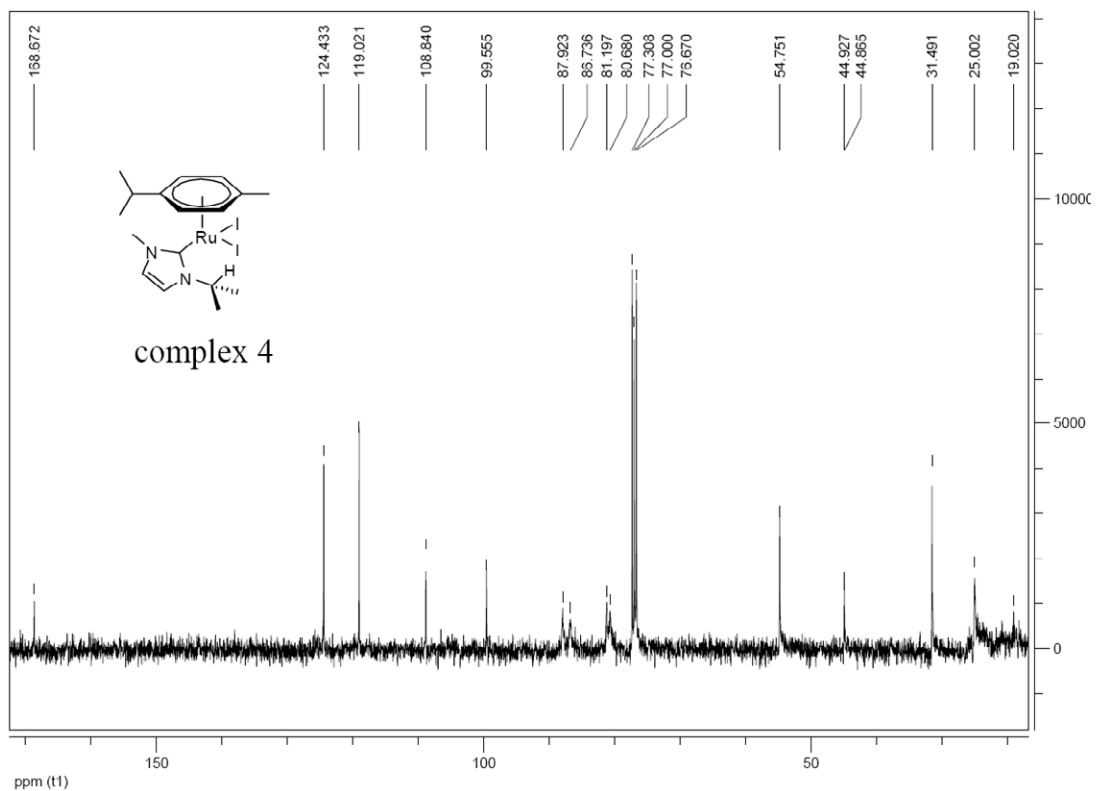

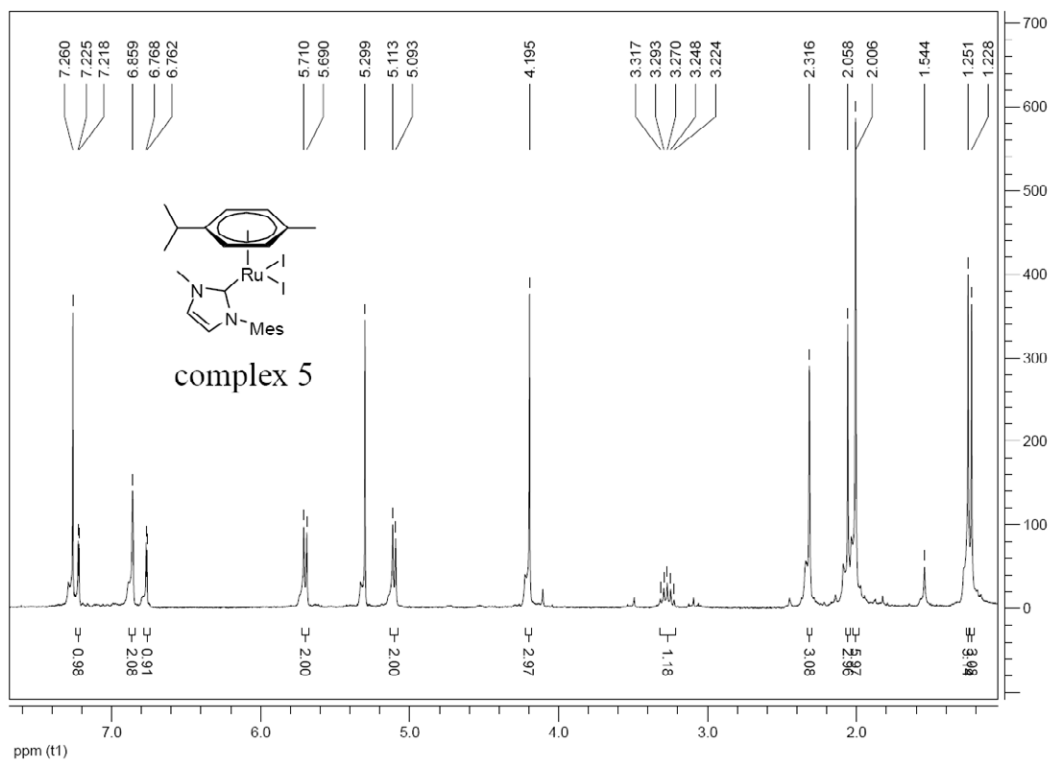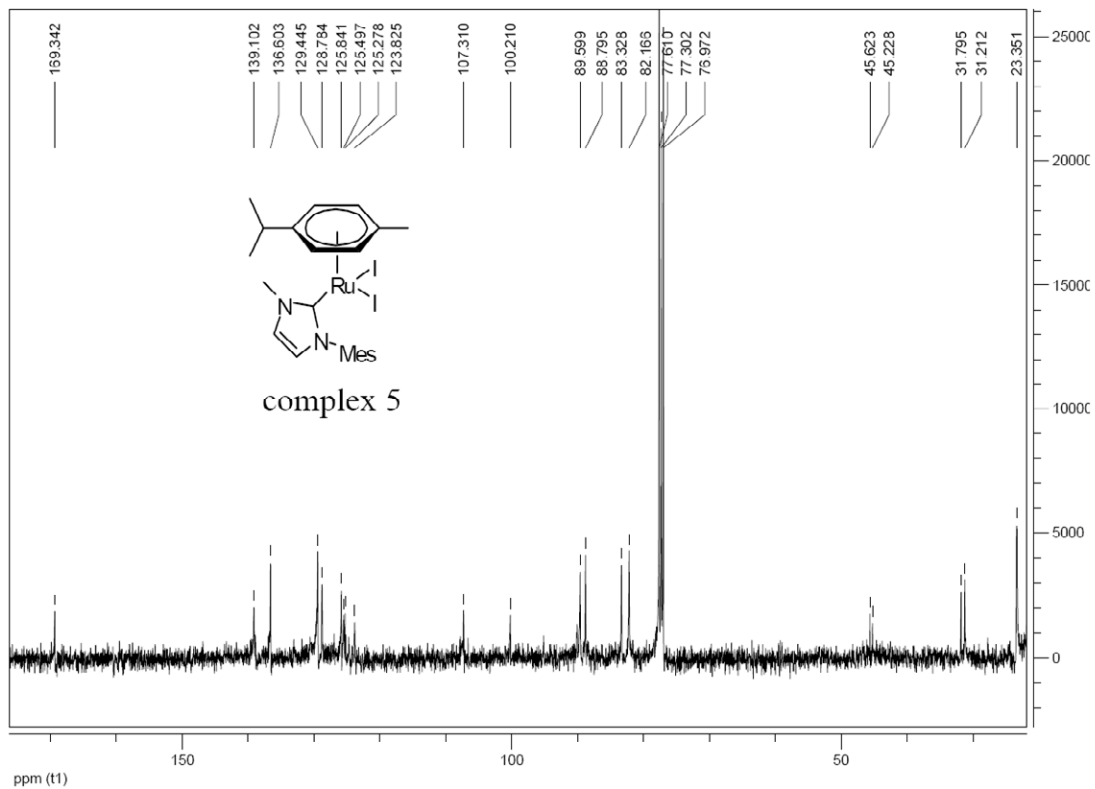

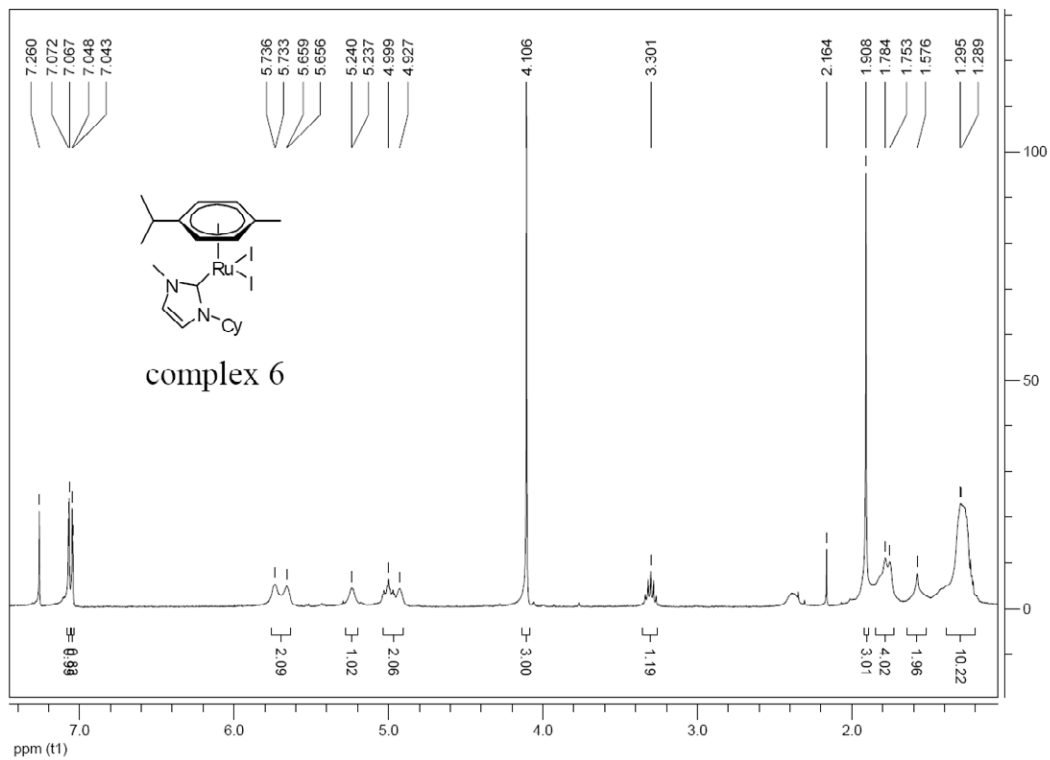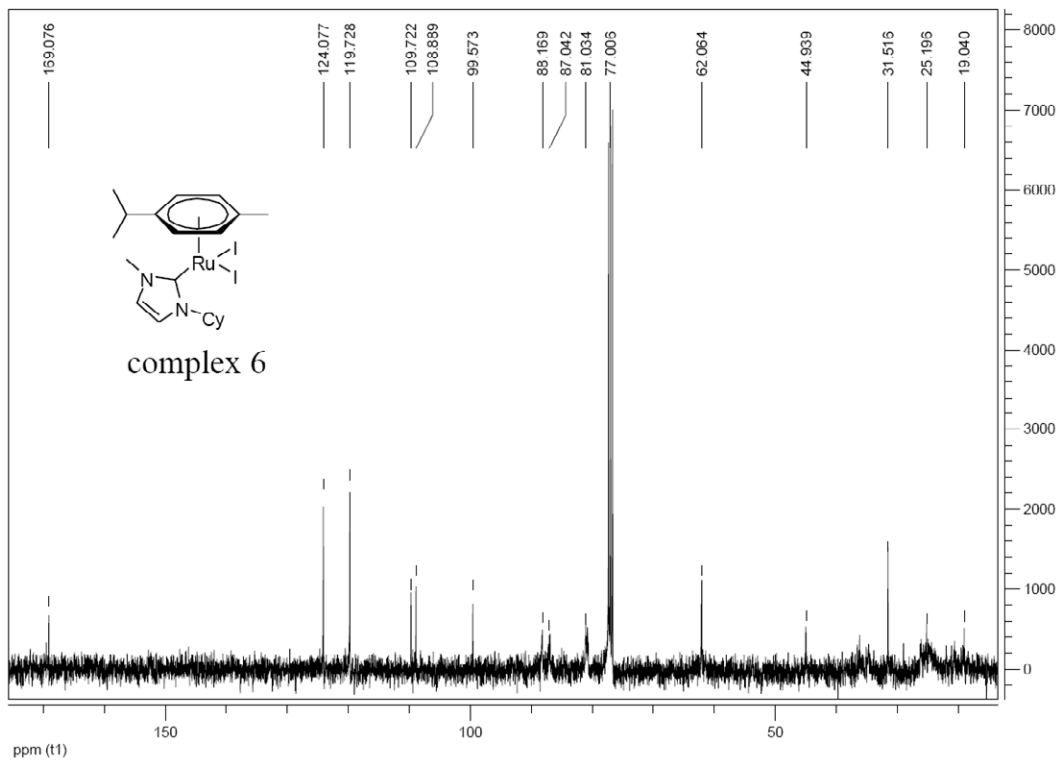



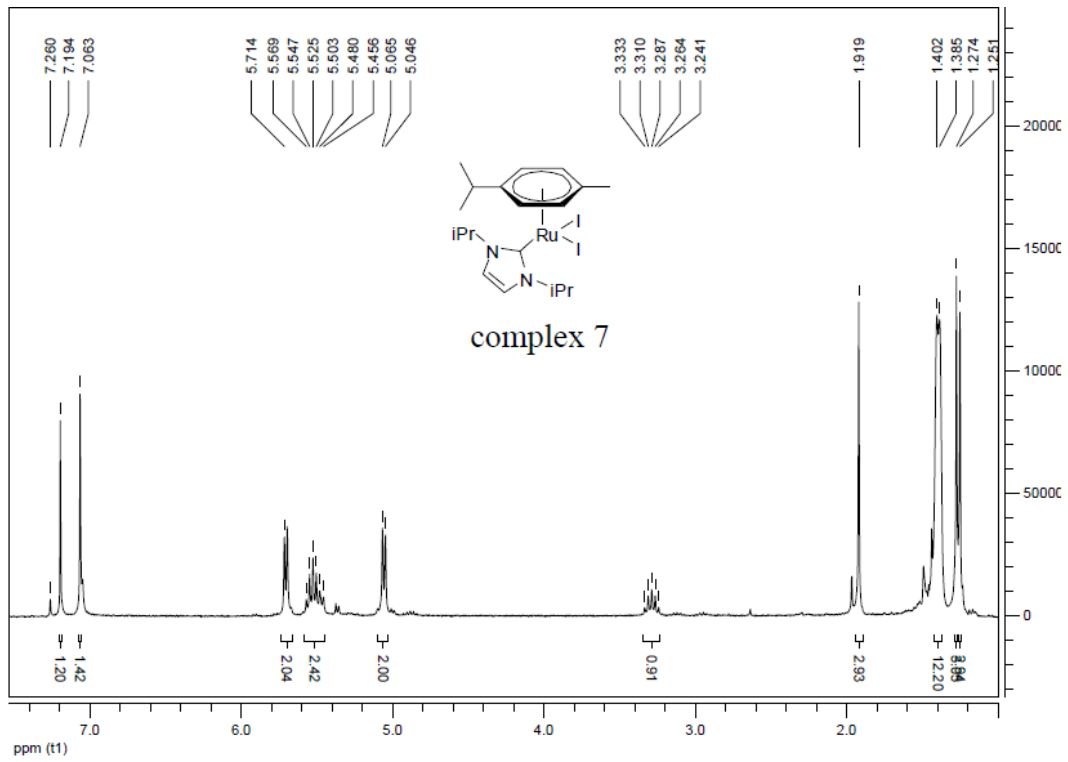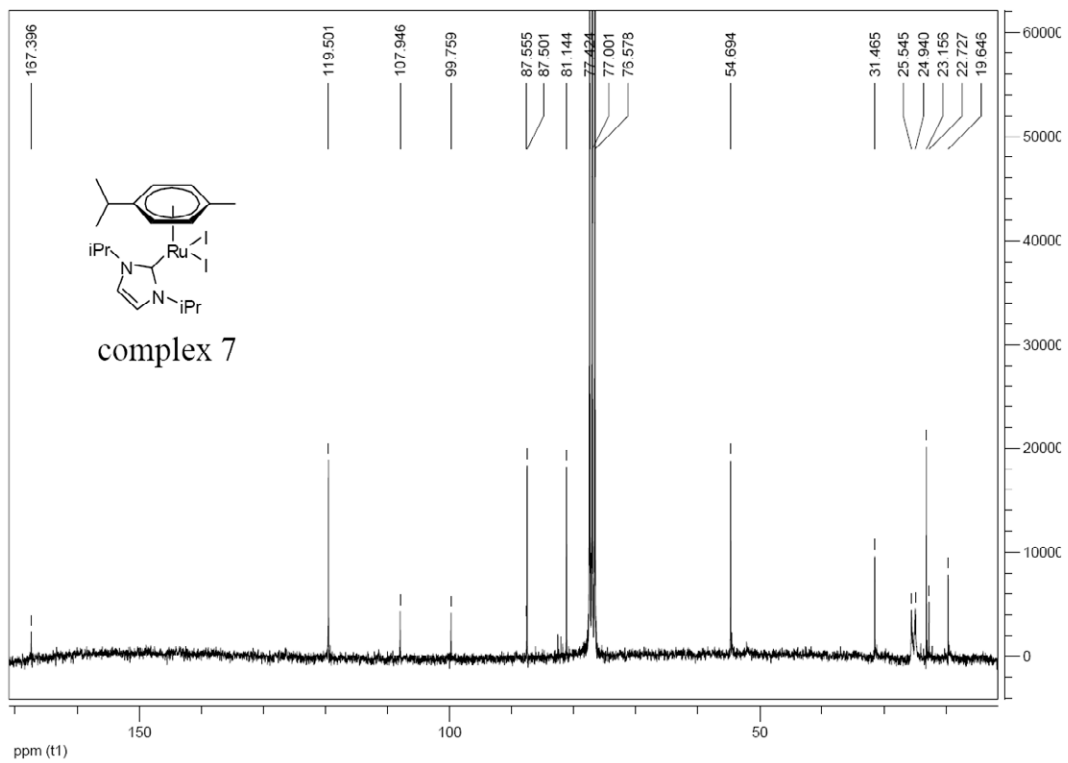

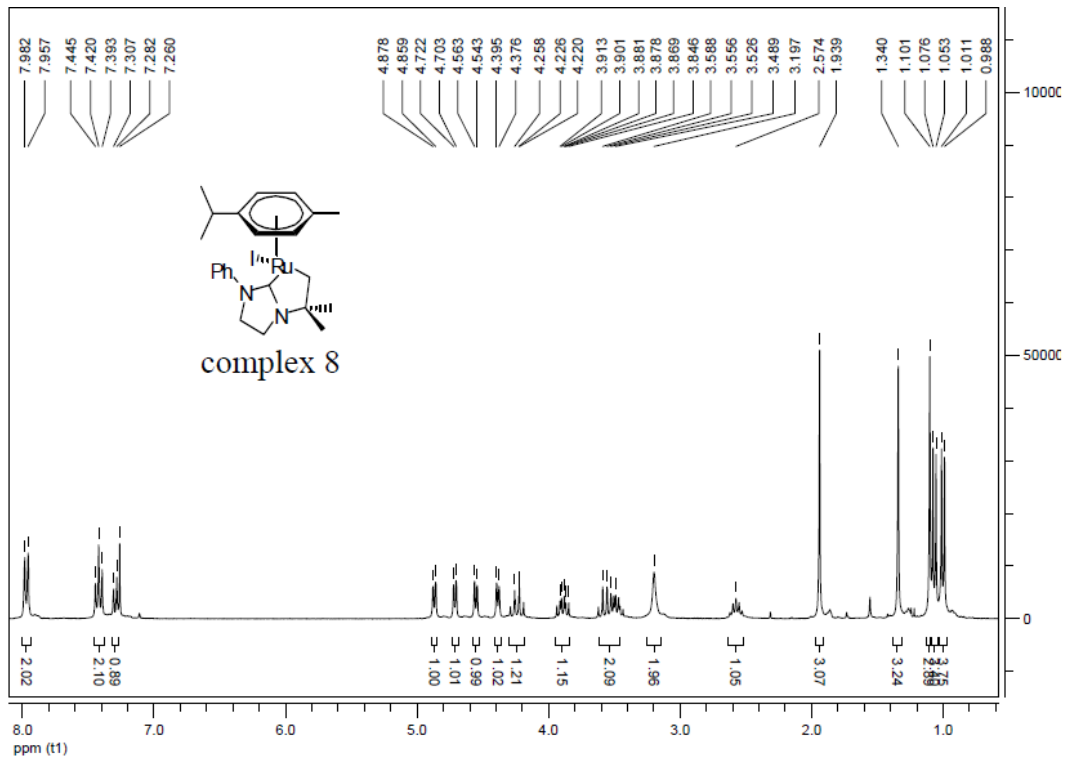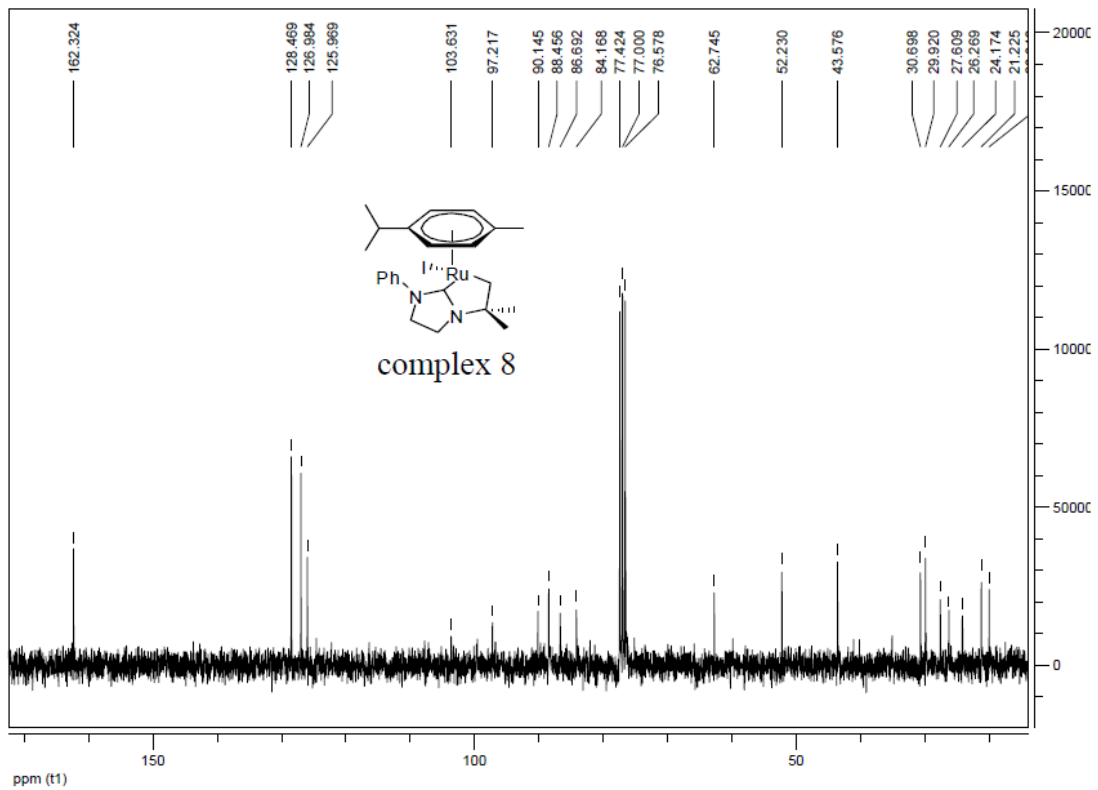

Supplement: b818091a.pdf [file b818091a.pdf]
